1 **Object representation in a gravitational reference frame**

2

3 Alexandriya M.X. Emonds<sup>1,2</sup>, Ramanujan Srinath<sup>2,3,4</sup>, Kristina J. Nielsen<sup>2,3,5</sup>, Charles E.

4 Connor<sup>2,3,5\*</sup>

5

6 <sup>1</sup>Department of Biomedical Engineering, Johns Hopkins University School of Medicine,

7 Baltimore, Maryland 21205, USA

8 <sup>2</sup>Zanvyl Krieger Mind/Brain Institute, Johns Hopkins University, Baltimore, Maryland 21218,

9 USA

10 <sup>3</sup>Solomon H. Snyder Department of Neuroscience, Johns Hopkins University School of

11 Medicine, Baltimore, Maryland 21205, USA

12 <sup>4</sup>Current address: Department of Neuroscience, University of Pittsburgh, Pittsburgh,

13 Pennsylvania 15260

14 <sup>5</sup>Senior authors

15

16 \*Correspondence: [connor@jhu.edu](mailto:connor@jhu.edu)

17

18

19 **ABSTRACT**

20 When your head tilts laterally, as in sports, reaching, and resting, your eyes counterrotate less  
21 than 20%, and thus eye images rotate, over a total range of about 180°. Yet, the world appears  
22 stable and vision remains normal. We discovered a neural strategy for rotational stability in  
23 anterior inferotemporal cortex (IT), the final stage of object vision in primates. We measured  
24 object orientation tuning of IT neurons in macaque monkeys tilted +25 and -25° laterally,  
25 producing ~40° difference in retinal image orientation. Among IT neurons with consistent  
26 object orientation tuning, 63% remained stable with respect to gravity across tilts. Gravitational  
27 tuning depended on vestibular/somatosensory but also visual cues, consistent with previous  
28 evidence that IT processes scene cues for gravity's orientation. In addition to stability across  
29 image rotations, an internal gravitational reference frame is important for physical  
30 understanding of a world where object position, posture, structure, shape, movement, and  
31 behavior interact critically with gravity.

32

33

## 34 INTRODUCTION

35 Reflexive eye movements compensate for up/down and right/left head movements, but when  
36 your head tilts laterally, as during sports, driving<sup>1</sup>, social communication<sup>2-5</sup>, working in cramped  
37 environments, reaching for distant objects, and resting in bed, your eyes compensate less than  
38 20%<sup>6,7</sup>, so retinal images rotate around the point of fixation. But the perceptual compensation  
39 for this is so automatic and complete that we are usually unaware of the image rotation, and  
40 visual abilities are not strongly affected. This perceptual stability is more than just a  
41 generalization of recognition across orientations. Critically, our perceptual reference frame for  
42 objects remains stable with respect to the environment and gravity. As a result, trees still  
43 appear vertical and apples still appear to fall straight to the ground, even though their  
44 orientations and trajectories on the retina have changed.

45

46 Here, we explored the hypothesis that this perceptual stability is produced by transforming  
47 visual objects into a stable, non-retinal reference frame. Our previous work has shown that the  
48 primate ventral visual pathway<sup>8</sup> implements an object-centered reference frame<sup>9-18</sup>, stabilizing  
49 against position and size changes on the retina. But this still leaves open the *orientation* of the  
50 ventral pathway reference frame. Our recent work has shown that one channel in anterior  
51 ventral pathway processes scene-level visual cues for the orientation of the gravitational  
52 reference frame<sup>19,20</sup>, raising the possibility that the ventral pathway reference frame is aligned  
53 with gravity. Here, we confirmed this hypothesis in anterior IT<sup>8</sup>, and found that gravitational  
54 alignment depends on both visual and vestibular/somatosensory<sup>21,22</sup> cues. To a lesser extent,  
55 we observed tuning aligned with the retinal reference frame, and object orientation in either  
56 reference frame was linearly decodable from IT population responses with high accuracy. This  
57 is consistent with psychophysical results showing voluntary perceptual access to either

58 reference frame<sup>23</sup>. The dominant, gravitationally aligned reference frame not only confers  
59 stability across image rotations but also enables physical understanding of objects in a world  
60 dominated by the force of gravity.

61

## 62 **RESULTS**

### 63 **Object tuning in a gravitational reference frame**

64 Monkeys performed a dot fixation task while we flashed object stimuli on a high-resolution LED  
65 monitor spanning 100° of the visual field in the horizontal direction. We used evolving stimuli  
66 guided by a genetic algorithm<sup>12,13,16–20</sup> to discover 3D objects that drove strong responses from  
67 IT neurons. We presented these objects centered at fixation, across a range of screen  
68 orientations, with the monkey's head (fixed to a rotating chair) tilted clockwise (–) or  
69 counterclockwise (+) by 25° about the axis of gaze (through the fixation point and the  
70 interpupillary midpoint) (Fig. 1a,b). Compensatory ocular counter-rolling was measured to be  
71 ~6° based on iris landmarks visible in high-resolution photographs, consistent with previous  
72 measurements<sup>6,7</sup>. We also found that 6° compensation produced the closest agreement in  
73 the retinal reference frame between object orientation tuning functions across tilts (Fig. S1).

74

75 The Fig. 1 example neuron was tested with both full scene stimuli (Fig. 1a), which included a  
76 textured ground surface and horizon, providing visual cues for the orientation of gravity, and  
77 isolated objects (Fig. 1b), presented on a circular gray background in an otherwise dark room,  
78 so that only vestibular and somatosensory cues indicated the orientation of gravity. Object  
79 orientation tuning remained stable with respect to gravity across tilts, peaking at orientation 0°,  
80 for both full scene (Fig. 1c,d) and isolated object (Fig. 1g,h) stimuli. Correspondingly,

81

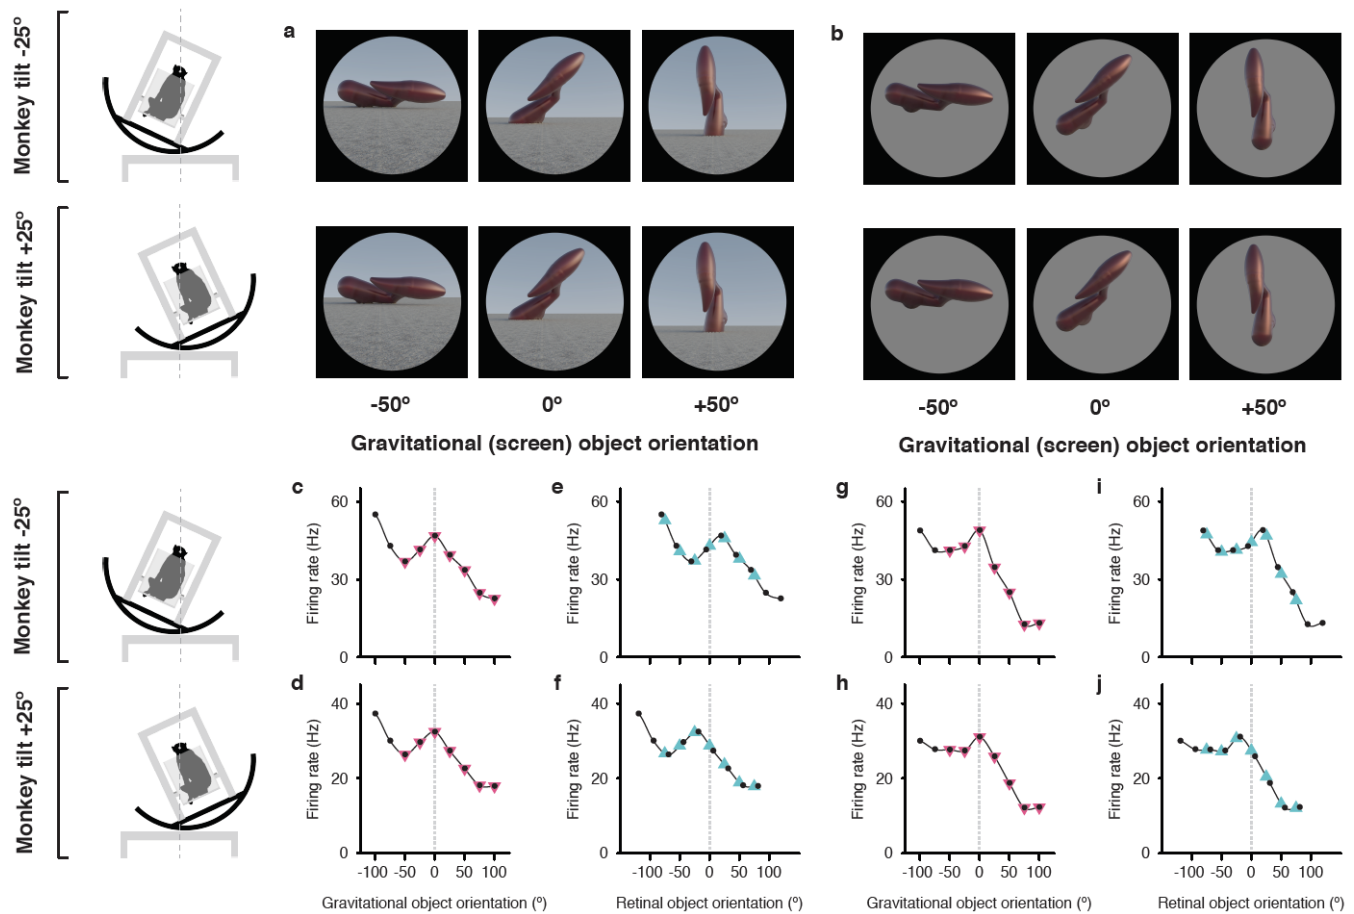

**Figure 1. Example neuron tuned for object orientation in a gravitational reference frame.** (a,b) Stimuli demonstrating example object orientations in the full scene condition. The orientation discovered in the genetic algorithm experiments is arbitrarily labeled 0°. The two monkey tilt conditions are diagrammed at left. The small *white dots* at the center of the head (connected by vertical *dashed lines*) represent the virtual axis of rotation produced by a circular sled supporting the chair. Stimuli were presented on a 100°-wide display screen for 750 ms (separated by 250 ms blank screen intervals) while the monkey fixated a central dot. Stimuli were presented in random order for a total of 5 repetitions each. (c,d) Responses of an example IT neuron to full scene stimuli, as a function of object orientation on the screen and thus with respect to gravity, across a 100° orientation range, while the monkey was tilted  $-25^\circ$  (c) and  $25^\circ$  (d). Response values are averaged across the 750 ms presentation time and across 5 repetitions and smoothed with a boxcar kernel of width  $50^\circ$  (3 orientation values). For this neuron, object orientation tuning remained consistent with respect to gravity across the two tilt conditions, with a peak response centered at  $0^\circ$  (*dashed vertical line*). The *pink triangles* indicate the object orientations directly comparable to the retinal analyses. (e,f) The same data plotted against orientation on the retina, corrected for  $6^\circ$  counter-rolling of the eyes (Fig. S1). The *cyan triangles* indicate the response values directly comparable to gravitational analyses. Due to the shift produced by ocular counter-rolling, these comparison values were interpolated between tested screen orientations using a Catmull-Rom spline. Since orientation tuning was consistent in gravitational space, the peaks are shifted right or left by about  $20^\circ$  each. (g-j) Similar results were obtained for this neuron with isolated object stimuli.

82  
83  
84  
85  
86  
87  
88  
89  
90  
91  
92  
93  
94  
95  
96  
97  
98  
99  
100  
101  
102  
103

104 orientation tuning profiles shifted relative to retinal orientation by about 40° between the two tilt  
105 conditions (Fig. 1e,f,i,j), shifting the peak to the right and left of 0°. A similar example neuron is  
106 presented in Fig. S2a,c–f, along with an example neuron for which tuning aligned with the  
107 retina, and thus shifted with respect to gravity (Fig. S2b,g–j).

108

### 109 **Distribution of gravity- and retina-aligned tuning**

110 Fig. 2a scatterplots correlation values between object orientation tuning functions in the two tilt  
111 conditions calculated with respect to retinal orientation (*x axis*) and gravity (*y axis*), for a  
112 sample of 89 IT neurons tested with full scene stimuli. In both the scatterplot and the marginal  
113 histograms, color indicates the result of a 1-tailed randomization t-test on each cell for  
114 significant positive correlation ( $p < 0.05$ ) in the gravitational reference frame (*pink*), retinal  
115 reference frame (*cyan*), or both reference frames (*dark gray*) (presumably due to the broad  
116 object orientation tuning of some IT neurons<sup>17</sup>).

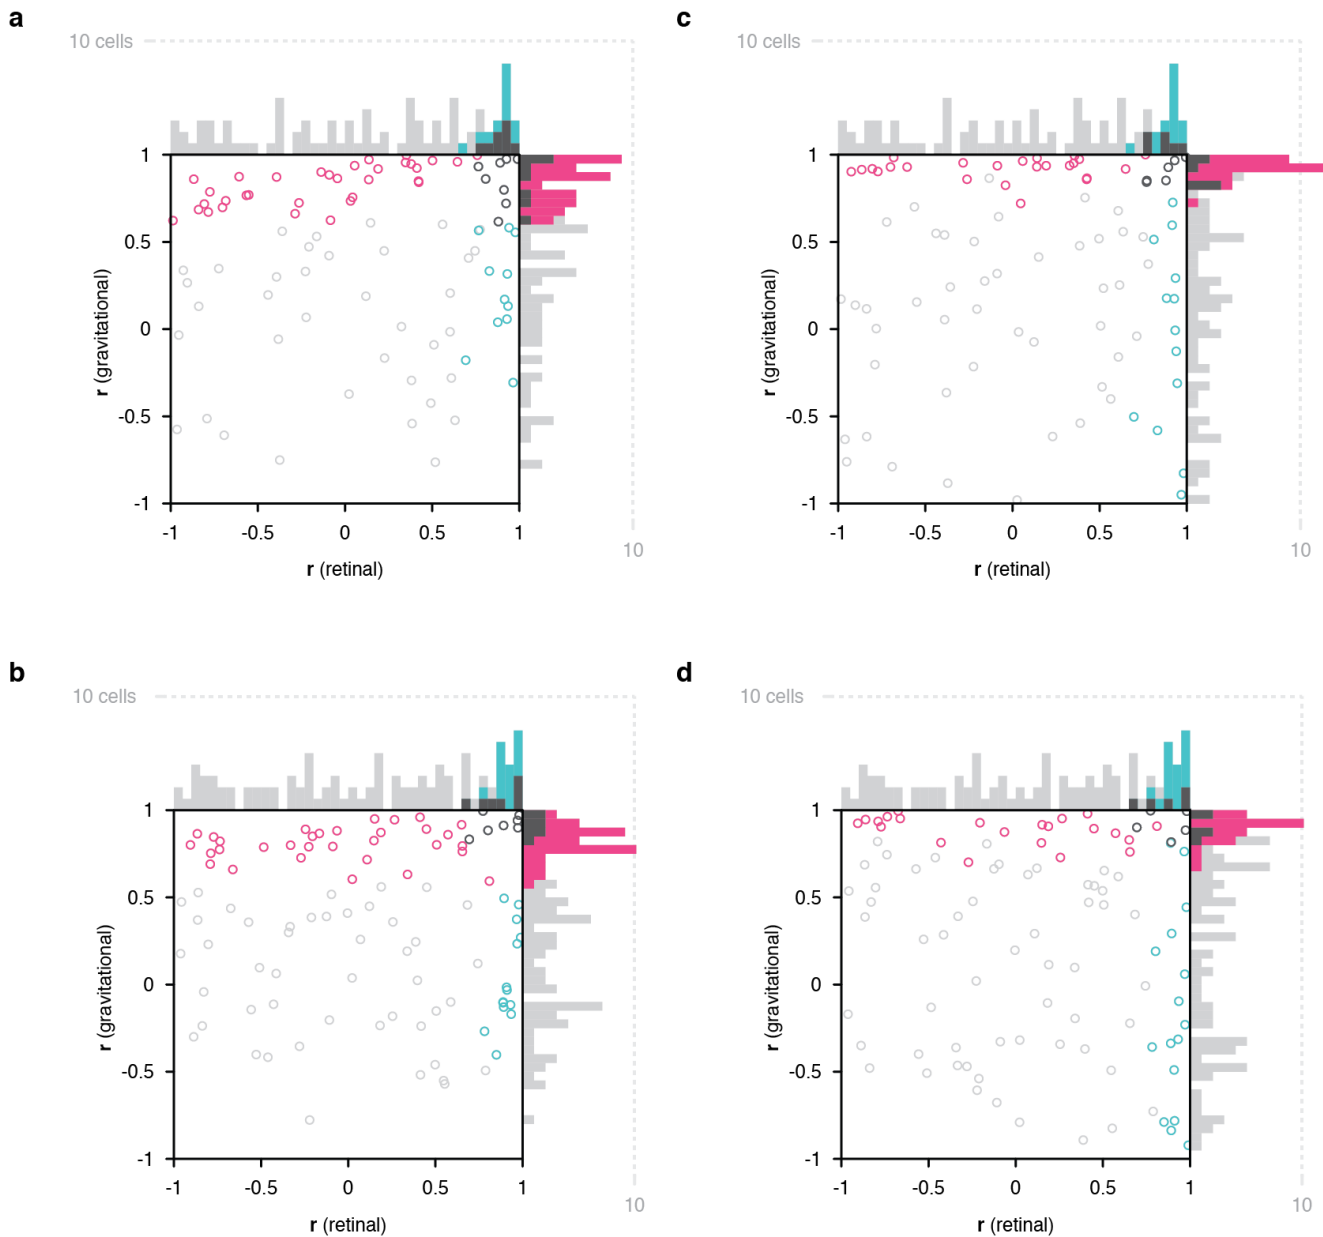

117

118 **Figure 2. Scatterplots of object orientation tuning function correlations across tilts.** (a) Scatterplot of  
119 correlations for full scene stimuli. Correlations of tuning in the gravitational reference frame ( $y$  axis) are  
120 plotted against correlations in the retinal reference frame ( $x$  axis). Marginal distributions are shown as  
121 histograms. Neurons with significant correlations with respect to gravity are colored *pink* and neurons with  
122 significant correlations with respect to the retinae are colored *cyan*. Neurons with significant correlations in  
123 both dimensions are colored *dark gray*, and neurons with no significant correlation are colored *light gray*. (b)  
124 Scatterplot for isolated object stimuli. Conventions the same as in (a). (c) Same scatterplot as in (a), but  
125 balanced for number of comparison orientations between gravitational and retinal analysis. (d) Same as (b),  
126 but balanced for number of comparison orientations between gravitational and retinal analysis.

127

128

129 Of the 52 neurons with consistent object orientation tuning in one or both reference frames,  
130 63% (33/52) were aligned with gravity, 21% (11/52) were aligned with the retinae, and 15%  
131 (8/52) were aligned with both. The population tendency toward positive correlation was  
132 significant along the gravitational axis (two-tailed randomization t-test for center-of-mass  
133 relative to 0;  $p = 6.49 \times 10^{-29}$ ) as well as the retinal axis ( $p = 5.76 \times 10^{-10}$ ). Similar results were  
134 obtained for a partially overlapping sample of 99 IT neurons tested with isolated object stimuli  
135 in a darkened room to remove visual cues for gravity (Fig. 2b), with 60% (32/53) significant  
136 correlation in the gravitational reference frame, 26% (14/53) significant correlation in the retinal  
137 reference frame, and 13% (7/53) significant in both reference frames. The population tendency  
138 toward positive correlation was again significant in this experiment along both gravitational ( $p =$   
139  $3.63 \times 10^{-22}$ ) and retinal axes ( $p = 1.63 \times 10^{-7}$ ).

140

141 The analyses above were based on the full set of orientation comparisons possible for the  
142 gravitational reference frame (7), while the experimental design inevitably produced fewer  
143 comparisons for the retinal reference frame (5). Rerunning the analyses based on just 5  
144 comparable object orientations in both reference frames (Fig. 1, *pink* and *cyan triangles*)  
145 produced the results shown in Figs. 2c and d. For full scene stimuli, this yielded 56% (23/41)  
146 significant gravitational alignment, 27% (11/41) retinal alignment, and 17% (7/41) dual  
147 alignment (Fig. 2c). For isolated object stimuli, this reanalysis yielded 58% (28/48) gravitational  
148 alignment, 29% (14/48) retinal alignment, and 13% (6/48) dual alignment (Fig. 2d).

149

### 150 **Population coding of orientation in both reference frames**

151 Neurons with no significant correlation in either reference frame might actually combine signals  
152 from both reference frames, as in other brain systems that interact with multiple reference



153 frames<sup>24–32</sup>. This would be consistent with human psychophysical results showing mixed  
154 influences of retinal and gravitational reference frames, with stronger weight for  
155 gravitational<sup>33,34</sup>. For mixed reference frame tuning of this kind, it has been shown that simple  
156 linear decoding can extract information in any one reference frame with an appropriate  
157 weighting pattern across neurons<sup>24,35,36</sup>. We tested that idea here and found that object  
158 orientation information in either gravitational or retinal space could be decoded with high  
159 accuracy from the responses of the IT neurons in our sample. The decoding task was to  
160 determine whether two population responses (across the 89 neurons tested with full scene  
161 stimuli) were derived from same or different orientations, either in gravitational space or retinal  
162 space (corrected for counter-rolling). This match/non-match task allowed us to analyze  
163 population information about orientation equivalence even though individual neurons were  
164 tested using different stimuli with no comparability between orientations. (Across neurons,  
165 orientations were aligned according to their order in the tested range, so that each non-match  
166 trial involved the same orientation difference, in the same direction, for each neuron.)

167

168 The accuracy of linear discriminant models for orientation match/non-match in the gravitational  
169 reference frame was 97% (10-fold cross-validation). The accuracy of models for orientation  
170 match/non-match in the retinal reference frame was 98%. This easy decoding of information in  
171 both reference frames is consistent with psychophysical results showing that humans have  
172 voluntary access to either reference frame<sup>23</sup>. High accuracy was obtained even with models  
173 based solely on neurons that showed no significant correlation in either gravitational or retinal  
174 reference frames (Fig. 2a, *light gray*): 89% for gravitational discrimination and 97% for retinal  
175 discrimination. This supports the idea that these neurons carry a mix of retinal and gravitational  
176 object orientation signals.

177

178 **Gravity-aligned tuning based on purely visual cues**

179 The results for isolated object stimuli in Fig. 2b,d indicate that alignment of object information  
180 with gravity does not require the visual cues present in the full scene stimuli (ground surface  
181 and horizon) and can be based purely on vestibular and somatosensory cues for the direction  
182 of gravity in a dark room. We also tested the converse question of whether purely visual cues  
183 (tilted horizon and ground surface) could produce alignment of object orientation tuning with  
184 the visually apparent orientation of gravity, even in the presence of conflicting vestibular and  
185 somatosensory cues (i.e. with the monkey in a normal upright orientation). In spite of the  
186 conflict, many neurons showed object orientation tuning functions aligned with the visually  
187 cued direction of gravity, as exemplified in Fig. 3a,c–f. The 5 object orientations that were  
188 comparable in a gravitational reference frame (*pink triangles*) produced consistent responses  
189 to object orientations relative to the ground surface and horizon (Fig. 3c,d). For example, the  
190 top left stimulus in Fig. 3a (horizon tilt  $-25^\circ$ , retinal orientation  $-25^\circ$ ) has the same orientation  
191 with respect to the ground surface as the bottom right stimulus (horizon tilt  $+25^\circ$ , retinal  
192 orientation  $+25^\circ$ ). Thus, in the visually-cued gravitational reference frame, these two stimuli  
193 line up at  $0^\circ$  orientation in both Fig. 3c and d, and they evoke similar responses. Conversely,  
194 the 9 orientations comparable in the retinal reference (*black dots* and *cyan triangles*) produced  
195 inconsistent responses (Fig. 3e,f). A different example neuron (Fig. 3b,g–j) exhibited object  
196 orientation tuning aligned with the retinae (Fig. 3i,j) and not gravity (Fig. 3g,h).

197

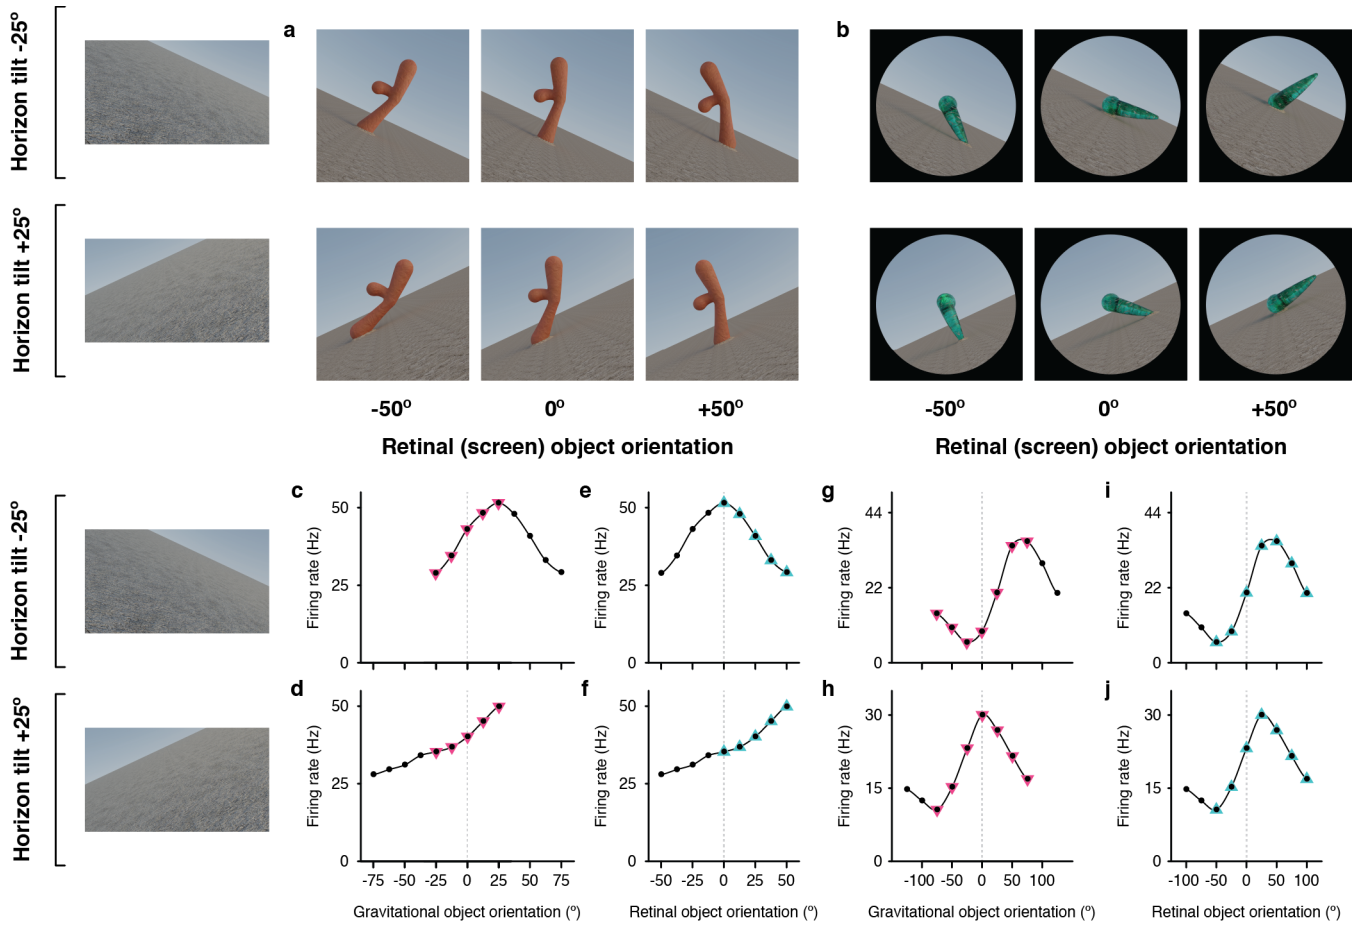

198  
199  
200  
201  
202  
203  
204  
205  
206  
207  
208  
209  
210  
211

**Figure 3. Example neurons tested with tilted horizon stimuli while the monkey remained in an upright orientation.** (a,b) Stimuli demonstrating example object orientations in two conditions, with the ground surface, horizon, and sky gradient tilted  $-25^\circ$  (clockwise, top row), and with ground surface, etc. tilted  $+25^\circ$  (counterclockwise, second row). The monkey was in a normal upright orientation during these experiments, producing conflicting vestibular/somatosensory cues. The retinal orientation discovered in the genetic algorithm experiments is arbitrarily labeled  $0^\circ$ . (c,d) For an example IT neuron tested with the stimuli in (a), object orientation tuning with respect to the visually cued direction of gravity was consistent across the two ground tilts. (e,f) Correspondingly, the neuron gave very different responses to retinal object orientation values between the two ground tilts. (g,h) This different example IT neuron tested with the stimuli in (b) did not exhibit consistent object orientation tuning in visually-cued gravitational space. (i,j) Instead, this neuron maintained consistent tuning for retinal-screen orientation despite changes in ground tilt.

212 Across a sample of 228 IT neurons studied in this cue conflict experiment, 123 showed  
213 significant correlation across visual ground/horizon tilt in one or both reference frames. Of  
214 these, 54% (67/123) showed object orientation tuning aligned with the retinal reference frame,  
215 35% (43/123) with the gravitational reference frame, and 11% (13/123) with both (Fig. 4a). The  
216 population tendency toward retina-aligned orientation tuning was significant (two-tailed  
217 randomization t-test for center-of-mass relative to 0;  $p = 8.14 \times 10^{-28}$ ) as was the tendency  
218 toward gravity-aligned orientation tuning ( $p = 6.23 \times 10^{-6}$ ). The experimental design in this  
219 case produced more comparisons in the retinal reference frame, and balancing the numbers of  
220 comparisons resulted in more equal percentages (Fig. 4b). The main result in this experiment,  
221 that many IT neurons exhibit object orientation tuning aligned with visual cues for the direction  
222 of gravity, even in the presence of conflicting vestibular/somatosensory cues, argues that  
223 visual cues contribute to gravity-aligned tuning under normal circumstances, where they  
224 combine with convergent vestibular/somatosensory cues. That would be consistent with our  
225 previous discovery that many neurons in IT are strongly tuned for the orientation of large-scale  
226 ground surfaces and edges, in the orientation ranges experienced across head tilts<sup>14,15</sup>, and  
227 more generally with the strong visual representation of scene information in temporal lobe<sup>37-40</sup>.  
228

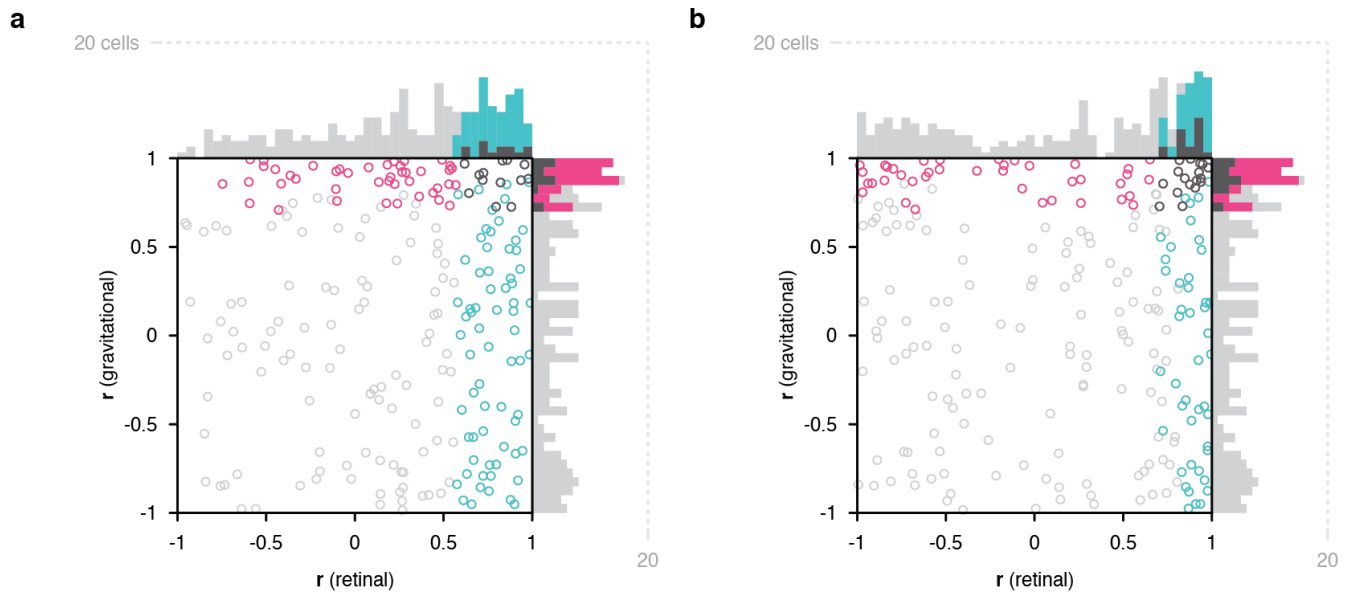

229

230

231

232

233

234

235

236

237

238

239

240

**Figure 4. Scatterplots of object orientation tuning function correlations across visual horizon tilts on the screen, with the monkey in an upright orientation.** (a) Scatterplot of correlations for full scene stimuli. Correlations of tuning in gravitational space as cued by horizon tilt (*y axis*) are plotted against correlations in retinal space (*x axis*). Marginal distributions are shown as histograms. Neurons with significant correlations in visually-cued gravitational space are colored *pink* and neurons with significant correlations in retinal space are colored *cyan*. Neurons with significant correlations in both dimensions are colored *dark gray*, and neurons with no significant correlation are colored *light gray*. (b) Same scatterplot as in (a), but with correlation values balanced for number of comparison orientations between gravitational and retinal analysis.

241 **DISCUSSION**

242 The fundamental goal of visual processing is to transform photoreceptor sheet responses into  
243 usable, essential information—readable, compressed, stable signals, for the specific things we  
244 need to understand about the world. In this sense, the transformation described here achieves  
245 both stability and specificity of object information. The gravitational reference frame remains  
246 stable across retinal image rotations, a critical advantage for vision from the tilting platform of  
247 the head and body. And, it enables understanding of object structure, posture, shape, motion,  
248 and behavior relative to the strong gravitational force that constrains and interacts with all  
249 these factors. It provides information about whether and how objects and object parts are  
250 supported and balanced against gravity, how flexible, motoric objects like bodies are  
251 interacting energetically with gravity, what postural or locomotive behaviors are possible or  
252 likely, and about potential physical interactions with other objects or with the observer under  
253 the influence of gravity. In other words, it provides information critical for guiding our  
254 mechanistic understanding of and skillful interactions with the world.

255  
256 A similar hypothesis about gravity-related tuning for tilted planes has been tested in parietal  
257 area CIP (central intraparietal area). Rosenberg and Angelaki<sup>41</sup> measured the responses of 46  
258 CIP neurons with two monkey tilts, right and left 30°, and fit the responses with linear models.  
259 They reported significant alignment with eye orientation for 45 of 92 (49%) tilt tests (right and  
260 left for each neuron), intermediate between eye and gravity for 26/92 tilt tests (28%), and  
261 alignment with gravity for 6/92 tilt tests (7%). However, of the 5 neurons in this last category,  
262 only one appeared to show significant alignment with gravity for both tilt directions (Rosenberg  
263 and Angelaki<sup>41</sup>, Fig. 4D). Thus, while orientation tuning of ~35% of CIP neurons was sensitive  
264 to monkey tilt and gravity-aligned information could be extracted with a neural network<sup>41</sup>, there

265 was no explicit tuning in a gravitational reference frame or dominance of gravitational  
266 information as found here. There is however compelling human fMRI evidence that parietal  
267 and frontal cortex are deeply involved in perceiving and predicting physical events<sup>42</sup>, and have  
268 unique abstract signals for stability not detected in ventral pathway<sup>43</sup> (though these could  
269 reflect decision-making processes<sup>44,45</sup>). Our results and others<sup>46–48</sup> suggest nonetheless that  
270 ventral pathway object and scene processing may be a critical source of information about  
271 gravity and its effects on objects, especially when detailed object representations are needed  
272 to assess precise shape, structure, support, strength, flexibility, compressibility, brittleness,  
273 specific gravity, mass distribution, and mechanical features to understand real world physical  
274 situations.

275

276 Our results raise the interesting question of *how* visual information is transformed into a  
277 gravity-aligned reference frame, and how that transformation incorporates vestibular,  
278 somatosensory, and visual cues for the direction of gravity. Previous work on reference frame  
279 transformation has involved *shifts* in the position of the reference frame. There is substantial  
280 evidence that these shifts are causally driven by anticipatory signals for attentional shifts and  
281 eye movements from prefrontal cortex, acting on ventral pathway cortex to activate neurons  
282 with newly relevant spatial sensitivities<sup>49–54</sup>. Here, the more difficult geometric problem is  
283 *rotation* of visual information, such that “up”, “down”, “right” and “left” become associated with  
284 signals from different parts of the retina, based on a change in the perceived direction of  
285 gravity. This could also involve spatial remapping, but in circular directions, within an object-  
286 centered reference frame<sup>10–18</sup>. Humans can perform tasks requiring mental rotation of shapes,  
287 but this is time consuming in proportion to the angle of required rotation<sup>55</sup>, and seems to rely  
288 on an unusual strategy of covert motor simulation<sup>56</sup>. The rotation required here is fast and so

289 automatic as to be unnoticeable. Discovering the underlying transformation mechanism will  
290 likely require extensive theoretical, computational, and experimental investigation.

291



292 **REFERENCES**

- 293 1. Zikovitz, D. C., & Harris, L. R. Head tilt during driving. *Ergonomics*, **42**, 740-746 (1999).  
294 <https://doi.org/10.1080/001401399185414>
- 295 2. Halberstadt, A. G., & Saitta, M. B. Gender, nonverbal behavior, and perceived dominance: A  
296 test of the theory. *Journal of Personality and Social Psychology*, **53**, 257-272 (1987).  
297 <https://doi.org/10.1037/0022-3514.53.2.257>
- 298 3. Mignault, A., & Chaudhuri, A. The many faces of a neutral face: Head tilt and perception of  
299 dominance and emotion. *Journal of nonverbal behavior*, **27**, 111-132 (2003).
- 300 4. Krumhuber, E., Manstead, A. S., & Kappas, A. Temporal aspects of facial displays in person  
301 and expression perception: The effects of smile dynamics, head-tilt, and gender. *Journal of*  
302 *Nonverbal Behavior*, **31**, 39-56 (2007).
- 303 5. Mara, M., & Appel, M. Effects of lateral head tilt on user perceptions of humanoid and  
304 android robots. *Computers in Human Behavior*, **44**, 326-334 (2015).  
305 <https://doi.org/10.1016/j.chb.2014.09.025>
- 306 6. Miller, E. F. Counterrolling of the human eyes produced by head tilt with respect to  
307 gravity. *Acta Oto-laryngologica*, **54**, 479-501 (1962).  
308 <https://doi.org/10.3109/00016486209126967>
- 309 7. Schworm, H. D., Ygge, J., Pansell, T., & Lennerstrand, G. Assessment of ocular counterroll  
310 during head tilt using binocular video oculography. *Investigative Ophthalmology & Visual*  
311 *Science*, **43**, 662-667 (2002).
- 312 8. Felleman, D. J., & Van Essen, D. C. Distributed hierarchical processing in the primate  
313 cerebral cortex. *Cerebral cortex (New York, NY: 1991)*, **1**, 1-47 (1991). DOI:  
314 [10.1093/cercor/1.1.1-a](https://doi.org/10.1093/cercor/1.1.1-a)
- 315 9. Pasupathy, A., and Connor, C.E. (1999). Responses to contour features in macaque area

- 316 V4. *J. Neurophysiol.* **82**, 2490–2502. <https://doi.org/10.1152/jn.1999.82.5.2490>
- 317 10. Pasupathy, A., and Connor, C.E. (2001). Shape representation in area V4: position-specific  
318 tuning for boundary conformation. *J. Neurophysiol.* **86**, 2505–2519.  
319 <https://doi.org/10.1152/jn.2001.86.5.2505>
- 320 11. Pasupathy, A., and Connor, C.E. (2002). Population coding of shape in area V4. *Nat.*  
321 *Neurosci.* **5**, 1332–1338. doi:10.1038/nn972
- 322 12. Carlson, E.T., Rasquinha, R.J., Zhang, K., and Connor, C.E. (2011). A sparse objectcoding  
323 scheme in area V4. *Curr. Biol.* **21**, 288–293. <https://doi.org/10.1016/j.cub.2011.01.013>
- 324 13. Srinath, R., Emonds, A., Wang, Q., Lempel, A. A., Dunn-Weiss, E., Connor, C. E., &  
325 Nielsen, K. J. Early emergence of solid shape coding in natural and deep network vision. *Curr.*  
326 *Biol.*, **31**, 51-65 (2021). <https://doi.org/10.1016/j.cub.2020.09.076>
- 327 14. Brincat, S.L. & Connor, C.E. (2004) Underlying principles of visual shape selectivity in  
328 posterior inferotemporal cortex. *Nat. Neurosci.* **7**, 880–886. doi:10.1038/nn1278
- 329 15. Brincat, S.L. & Connor, C.E. (2006) Dynamic shape synthesis in posterior inferotemporal  
330 cortex. *Neuron* **49**, 17–24. <https://doi.org/10.1016/j.neuron.2005.11.026>
- 331 16. Yamane, Y., Carlson, E.T., Bowman, K.C., Wang, Z., and Connor, C.E. A neural code for  
332 three-dimensional object shape in macaque inferotemporal cortex. *Nat. Neurosci.* **11**, 1352–  
333 1360 (2008). doi:10.1038/nn.2202
- 334 17. Hung, C.C., Carlson, E.T., and Connor, C.E. Medial axis shape coding in macaque  
335 inferotemporal cortex. *Neuron* **74**, 1099–1113 (2012).  
336 <https://doi.org/10.1016/j.neuron.2012.04.029>
- 337 18. Connor, C.E., & Knierim, J.J. (2017). Integration of objects and space in perception and  
338 memory. *Nature Neuroscience* **20**: 1493–1503. doi:10.1038/nn.4657

- 339 19. Vaziri, S., Carlson, E.T., Wang, Z., and Connor, C.E. A channel for 3D environmental  
340 shape in anterior inferotemporal cortex. *Neuron* **84**, 55–62 (2014).  
341 <https://doi.org/10.1016/j.neuron.2014.08.043>
- 342 20. Vaziri, S., and Connor, C.E. Representation of gravity-aligned scene structure in ventral  
343 pathway visual cortex. *Curr. Biol.* **26**, 766–774 (2016).  
344 <https://doi.org/10.1016/j.cub.2016.01.022>
- 345 21. Brandt, T., Dieterich, M., & Danek, A. Vestibular cortex lesions affect the perception of  
346 verticality. *Annals of Neurology: Official Journal of the American Neurological Association and*  
347 *the Child Neurology Society*, **35**, 403-412 (1994). <https://doi.org/10.1002/ana.410350406>
- 348 22. Baier, B., Thömke, F., Wilting, J., Heinze, C., Geber, C., & Dieterich, M. A pathway in the  
349 brainstem for roll-tilt of the subjective visual vertical: evidence from a lesion–behavior mapping  
350 study. *Journal of Neuroscience*, **32**, 14854-14858 (2012).  
351 <https://doi.org/10.1523/JNEUROSCI.0770-12.2012>
- 352 23. Attneave, F., & Reid, K. W. Voluntary control of frame of reference and slope equivalence  
353 under head rotation. *Journal of Experimental Psychology*, **78**, 153 (1968).  
354 <https://doi.org/10.1037/h0026150>
- 355 24. Stricanne, B., Andersen, R. A., & Mazzoni, P. (1996). Eye-centered, head-centered, and  
356 intermediate coding of remembered sound locations in area LIP. *Journal of Neurophysiology*,  
357 **76**, 2071-2076 (1996). <https://doi.org/10.1152/jn.1996.76.3.2071>
- 358 25. Buneo, C. A., Jarvis, M. R., Batista, A. P., & Andersen, R. A. Direct visuomotor  
359 transformations for reaching. *Nature*, **416**, 632-636 (2002).
- 360 26. Avillac, M., Deneve, S., Olivier, E., Pouget, A., & Duhamel, J. R. Reference frames for  
361 representing visual and tactile locations in parietal cortex. *Nature neuroscience*, **8**, 941-949  
362 (2005). doi:10.1038/nn1480

- 363 27. Mullette-Gillman, O. D. A., Cohen, Y. E., & Groh, J. M. Eye-centered, head-centered, and  
364 complex coding of visual and auditory targets in the intraparietal sulcus. *Journal of*  
365 *Neurophysiology*, **94**, 2331-2352 (2005). <https://doi.org/10.1152/jn.00021.2005>
- 366 28. Mullette-Gillman, O. D. A., Cohen, Y. E., & Groh, J. M. Motor-related signals in the  
367 intraparietal cortex encode locations in a hybrid, rather than eye-centered reference  
368 frame. *Cerebral Cortex*, **19**, 1761-1775 (2009). <https://doi.org/10.1093/cercor/bhn207>
- 369 29. Caruso, V. C., Pages, D. S., Sommer, M. A., & Groh, J. M. Compensating for a shifting  
370 world: evolving reference frames of visual and auditory signals across three multimodal brain  
371 areas. *Journal of neurophysiology*, **126**, 82-94 (2021). <https://doi.org/10.1152/jn.00385.2020>
- 372 30. Chang, S. W., & Snyder, L. H. Idiosyncratic and systematic aspects of spatial  
373 representations in the macaque parietal cortex. *Proceedings of the National Academy of*  
374 *Sciences*, **107**, 7951-7956 (2010). <https://doi.org/10.1073/pnas.0913209107>
- 375 31. McGuire, L. M., & Sabes, P. N. Heterogeneous representations in the superior parietal  
376 lobule are common across reaches to visual and proprioceptive targets. *Journal of*  
377 *Neuroscience*, **31**, 6661-6673 (2011). <https://doi.org/10.1523/JNEUROSCI.2921-10.2011>
- 378 32. Chen, X., DeAngelis, G. C., & Angelaki, D. E. Diverse spatial reference frames of  
379 vestibular signals in parietal cortex. *Neuron*, **80**, 1310-1321 (2013).  
380 <https://doi.org/10.1016/j.neuron.2013.09.006>
- 381 33. Bock, O. L., & Dalecki, M. Mental rotation of letters, body parts and scenes during whole-  
382 body tilt: Role of a body-centered versus a gravitational reference frame. *Human Movement*  
383 *Science*, **40**, 352-358 (2015). <https://doi.org/10.1016/j.humov.2015.01.017>
- 384 34. Corballis, M. C., Nagourney, B. A., Shetzer, L. I., & Stefanatos, G. Mental rotation under  
385 head tilt: Factors influencing the location of the subjective reference frame. *Perception &*  
386 *Psychophysics*, **24**, 263-273 (1978).

- 387 35. Deneve, S., Latham, P. E., & Pouget, A. Efficient computation and cue integration with  
388 noisy population codes. *Nature neuroscience*, **4**, 826-831 (2001).
- 389 36. Pouget, A., Deneve, S., & Duhamel, J. R. A computational perspective on the neural basis  
390 of multisensory spatial representations. *Nature Reviews Neuroscience*, **3**, 741-747 (2002).
- 391 37. Epstein, R., & Kanwisher, N. A cortical representation of the local visual  
392 environment. *Nature*, **392**, 598-601 (1998).
- 393 38. Epstein, R. A. Parahippocampal and retrosplenial contributions to human spatial  
394 navigation. *Trends in cognitive sciences*, **12**, 388-396 (2008).  
395 <https://doi.org/10.1016/j.tics.2008.07.004>
- 396 39. Lescroart, M. D., & Gallant, J. L. Human scene-selective areas represent 3D configurations  
397 of surfaces. *Neuron*, **101** 178-192 (2019). <https://doi.org/10.1016/j.neuron.2018.11.004>
- 398 40. Kornblith, S., Cheng, X., Ohayon, S., & Tsao, D. Y. A network for scene processing in the  
399 macaque temporal lobe. *Neuron*, **79**, 766-781 (2013).  
400 <https://doi.org/10.1016/j.neuron.2013.06.015>
- 401 41. Rosenberg, A., & Angelaki, D. E. Gravity influences the visual representation of object tilt in  
402 parietal cortex. *Journal of Neuroscience*, **34**, 14170-14180 (2014).  
403 <https://doi.org/10.1523/JNEUROSCI.2030-14.2014>
- 404 42. Fischer, J., Mikhael, J. G., Tenenbaum, J. B., & Kanwisher, N. Functional neuroanatomy of  
405 intuitive physical inference. *PNAS*, **113**, E5072-E5081 (2016).  
406 <https://doi.org/10.1073/pnas.1610344113>
- 407 43. Pramod, R. T., Cohen, M. A., Tenenbaum, J. B., & Kanwisher, N. Invariant representation  
408 of physical stability in the human brain. *eLife*, **11**, e71736 (2022).  
409 <https://doi.org/10.7554/eLife.71736>

- 410 44. Shadlen, M. N., & Newsome, W. T. (2001). Neural basis of a perceptual decision in the  
411 parietal cortex (area LIP) of the rhesus monkey. *Journal of neurophysiology*, *86*(4), 1916-1936.  
412 <https://doi.org/10.1152/jn.2001.86.4.1916>
- 413 45. Gold, J. I., & Shadlen, M. N. (2007). The neural basis of decision making. *Annual review of*  
414 *neuroscience*, *30*(1), 535-574. 10.1146/annurev.neuro.29.051605.113038
- 415 46. Gallivan, J. P., Cant, J. S., Goodale, M. A., & Flanagan, J. R. Representation of object  
416 weight in human ventral visual cortex. *Current Biology*, **24**, 1866-1873 (2014).  
417 <https://doi.org/10.1016/j.cub.2014.06.046>
- 418 47. Gallivan, J. P., Johnsrude, I. S., & Randall Flanagan, J. Planning ahead: object-directed  
419 sequential actions decoded from human frontoparietal and occipitotemporal networks.  
420 *Cerebral Cortex*, **26**, 708-730 (2016). <https://doi.org/10.1093/cercor/bhu302>
- 421 48. Cesanek, E., Zhang, Z., Ingram, J. N., Wolpert, D. M., & Flanagan, J. R. Motor memories  
422 of object dynamics are categorically organized. *Elife*, **10** (2021). [10.7554/eLife.71627](https://doi.org/10.7554/eLife.71627)
- 423 49. Tolias, A. S., Moore, T., Smirnakis, S. M., Tehovnik, E. J., Siapas, A. G., & Schiller, P. H.  
424 Eye movements modulate visual receptive fields of V4 neurons. *Neuron*, **29**, 757-767 (2001).  
425 [https://doi.org/10.1016/S0896-6273\(01\)00250-1](https://doi.org/10.1016/S0896-6273(01)00250-1)
- 426 50. Moore, T., & Armstrong, K. M. Selective gating of visual signals by microstimulation of  
427 frontal cortex. *Nature*, **421**, 370-373 (2003).
- 428 51. Moore, T., Armstrong, K. M., & Fallah, M. Visuomotor origins of covert spatial attention.  
429 *Neuron*, **40**, 671-683 (2003). [https://doi.org/10.1016/S0896-6273\(03\)00716-5](https://doi.org/10.1016/S0896-6273(03)00716-5)
- 430 52. Armstrong, K. M., Fitzgerald, J. K., & Moore, T. Changes in visual receptive fields with  
431 microstimulation of frontal cortex. *Neuron*, **50**, 791-798 (2006).  
432 <https://doi.org/10.1016/j.neuron.2006.05.010>

- 433 53. Schafer, R. J., & Moore, T. Selective attention from voluntary control of neurons in  
434 prefrontal cortex. *Science*, **332**, 1568-1571 (2011). [DOI: 10.1126/science.1199892](https://doi.org/10.1126/science.1199892)
- 435 54. Noudoost, B., & Moore, T. Control of visual cortical signals by prefrontal dopamine. *Nature*,  
436 **474**, 372-375 (2011). doi:10.1038/nature09995
- 437 55. Shepard, R. N., & Metzler, J. Mental rotation of three-dimensional objects. *Science*, **171**,  
438 701-703 (1971).
- 439 56. Wexler, M., Kosslyn, S. M., & Berthoz, A. Motor processes in mental rotation. *Cognition*,  
440 **68**, 77-94 (1998). [https://doi.org/10.1016/S0010-0277\(98\)00032-8](https://doi.org/10.1016/S0010-0277(98)00032-8)
- 441

## 442 **MATERIALS AND METHODS**

443 **Data and code availability.** The data and code that support the findings of this study have

444 been deposited in a public Github repository <https://github.com/amxemonds/ObjectGravity>.

445 Further information and requests for data or custom MATLAB code should be directed to and

446 will be fulfilled by the corresponding author, Charles E. Connor ([connor@jhu.edu](mailto:connor@jhu.edu)).

447

448 **Behavioral task, stimulus presentation, and electrophysiological recording.** Two head-

449 restrained male rhesus monkeys (*Macaca mulatta*) were trained to maintain fixation within 1°

450 (radius) of a 0.3° diameter spot for 4 s to obtain a juice reward. Eye position was monitored

451 with an infrared eye tracker (EyeLink). Image stimuli were displayed on a 3840 x 2160

452 resolution, 80.11 DPI television screen placed directly in front of the monkey, centered at eye

453 level at a distance of 60 cm. The screen subtended 70° vertically and 100° horizontally.

454 Monkeys were seated in a primate chair attached to a  $\pm 25^\circ$  full-body rotation

455 mechanism with the center of rotation at the midpoint between the eyes, so that the angle of

456 gaze toward the fixation point remained constant across rotations. The rotation mechanism

457 locked at body orientations of  $-25^\circ$  (tilted clockwise),  $0^\circ$ , and  $+25^\circ$  (counterclockwise). After

458 fixation was initiated by the monkey, 4 stimuli were presented sequentially, for 750 ms each,

459 separated by 250 ms intervals with a blank, gray background. All stimuli in a given generation

460 were tested in random order for a total of 5 repetitions. The electrical activity of well-isolated

461 single neurons was recorded with epoxy-coated tungsten electrodes (FHC Microsystems).

462 Action potentials of individual neurons were amplified and electrically isolated using a Tucker-

463 Davis Technologies recording system. Recording positions ranged from 5 to 25 mm anterior to

464 stereotaxic 0 within the inferior temporal lobe, including the ventral bank of the superior

465 temporal sulcus, lateral convexity, and basal surface. Positions were determined on the basis



466 of structural magnetic resonance images and the sequence of sulci and response  
467 characteristics observed while lowering the electrode. A total of 368 object-selective IT  
468 neurons were studied with different combinations of experiments. All animal procedures were  
469 approved by the Johns Hopkins Animal Care and Use Committee and conformed to US  
470 National Institutes of Health and US Department of Agriculture guidelines.

471

472 **Stimulus generation.** Initially random 3D stimuli evolved through multiple generations under  
473 control of a genetic algorithm<sup>12–16</sup>, leading to high-response stimuli used to test object  
474 orientation tuning as a function of eye/head/body rotation. Random shapes were created by  
475 defining 3D mesh surfaces surrounding medial axis skeletons<sup>13</sup>. These shapes were assigned  
476 random or evolved optical properties including color, surface roughness, specular/reflectance,  
477 translucency/transparency, and subsurface scattering. They were depicted as projecting from  
478 (partially submerged in) planar ground surfaces covered with a random scrub grass texture  
479 extending toward a distant horizon meeting a blue, featureless sky, with variable ambient light  
480 color and lighting direction consistent with random or evolved virtual times of day. Ground  
481 surface tilt and object orientation were independent variables of interest as described in the  
482 main text. These varied across ranges of 100–200° at intervals of 12.5 or 25°. Ground surface  
483 slant, texture gradient, and horizon level, as well as object size and appearance, varied with  
484 random or evolved virtual viewing distances. The entire scenes were rendered with multi-step  
485 ray tracing using Blender Cycles running on a cluster of GPU-based machines.

486

487 **Data analysis and statistics.** Response rates for each stimulus were calculated by counting  
488 action potentials during the presentation window and averaging across 5 repetitions.

489 Orientation tuning functions were smoothed with boxcar averaging across 3 neighboring

490 values. Pearson correlation coefficients between object orientation tuning functions in different  
491 conditions (in some cases corrected for ocular counter-rolling) were calculated for the  
492 averaged, smoothed values. Significance of positive correlations were measured with a 1-  
493 tailed randomization t-test,  $p = 0.05$ . (There was no a priori reason to predict or test for  
494 negative correlations between orientation tuning functions.) A null distribution was created by  
495 randomly assigning response values across the tested orientations within each of the two  
496 tuning functions and recalculating the t-statistic 10,000 times. Significant biases of population  
497 correlation distributions toward positive or negative values were measured with 2-tailed  
498 randomization t-tests, with exact p-values reported. A null distribution was created by randomly  
499 assigning response values across the tested orientations within each of the two tuning  
500 functions for each neuron, recalculating the t-statistic for each neuron, and recalculating the  
501 correlation distribution center of mass on the correlation domain 10,000 times.

502

503 **Population decoding analysis.** We pooled data across 89 neurons tested with full scene  
504 stimuli at the two monkey tilts and used cross-validated linear discriminant analysis to  
505 discriminate matching from non-matching orientations in both the retinal and gravitational  
506 reference frames. Ground truth matches were identical (in either gravitational or counter-rolling  
507 corrected retinal coordinates, depending on which reference frame was being tested). Ground  
508 truth non-matches differed by more than  $25^\circ$ . We equalized the numbers of retinal and  
509 gravitational match and non-match conditions by subsampling. This yielded five potential pairs  
510 of matches and 20 potential pairs of non-matches for each reference frame. For each member  
511 of a test pair, we randomly selected one raw response value for each neuron from among the  
512 5 individual repetitions for that object orientation. We generated a dataset for all possible test  
513 pairs under these conditions. We used the Matlab function `fitcdiscr` to build optimal models for

514 linear discrimination of matches from non-matches based on response patterns across the 89  
515 neurons. We built separate models for retinal and gravitational reference frame match/non-  
516 match discrimination. We report the accuracy of the models as  $1 - \text{misclassification rate}$  using  
517 10-fold cross validation.

518

519 **Acknowledgements:** The authors acknowledge the design and manufacturing contributions of  
520 William Nash, William Quinlan, and James Garmon, the software and hardware engineering  
521 contributions of Justin Killibrew, and the animal care, handling, training, and surgery  
522 contributions of Ofelia Garalde. Dr. Amy Bastian commented on the manuscript.

523

524 **Author Contributions:** A.M.X.E., K.J.N., and C.E.C. designed the experiments and analyses,  
525 all of which were performed by A.M.X.E., except for the population coding analyses, which  
526 were designed and performed by R.S.

527

528 **Conflict of Interest Declaration:** The authors declare that they have no competing interests.

529 **SUPPLEMENTARY INFORMATION**

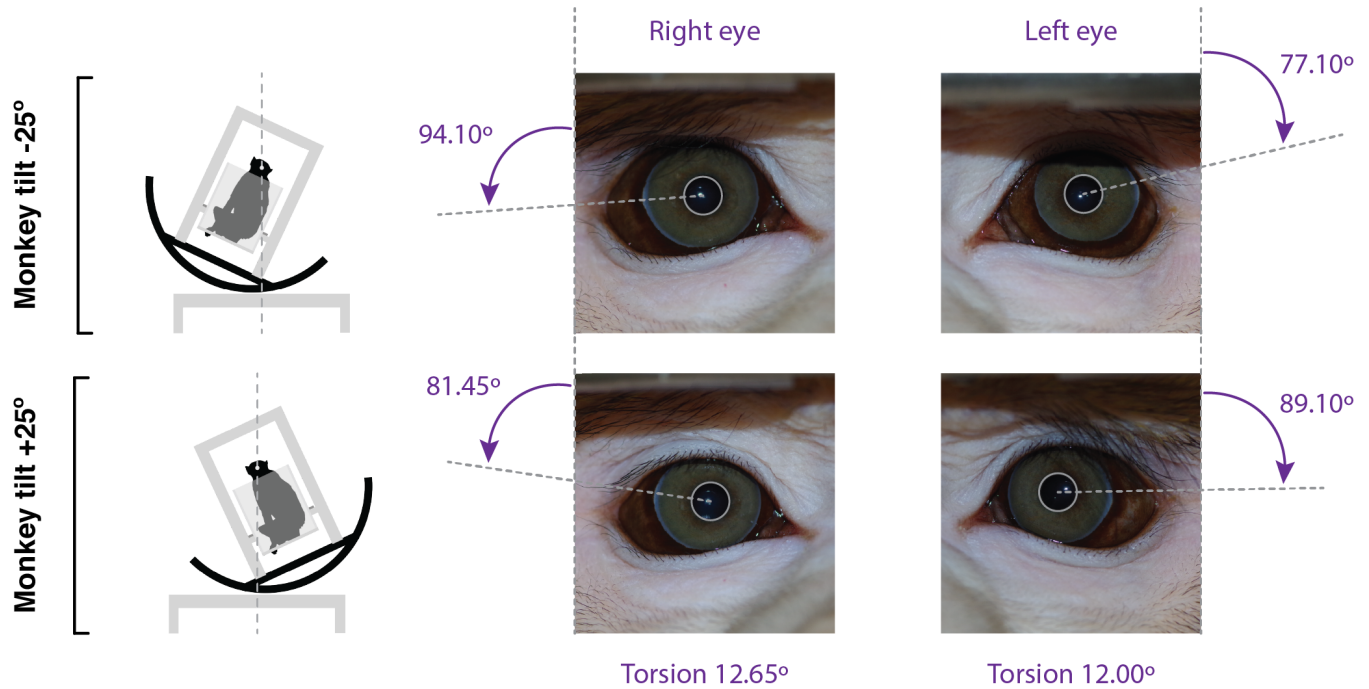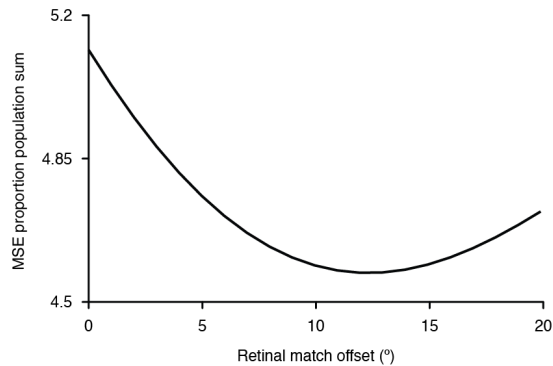

532 **Figure S1. Analysis of eye counter-rotation during tilt.** Eye orientation was estimated with lines  
533 connecting the center of the pupil with visualizable features at the edge of the iris. For the right and left eyes  
534 in the same monkey, the measured difference in eye orientation was 12.65° for the right eye and 12.00° for  
535 the left eye (*upper right*). For all the data, from both monkeys, we normalized and summed the mean  
536 squared error (MSE) between responses at corresponding retinal positions, as a function of the offset value  
537 between retinal positions used to compensate for counter-rotation (*lower left*). The minimum MSE was  
538 measured at 12° offset, corresponding to 6° rotation from normal in each of the tilt conditions.  
539

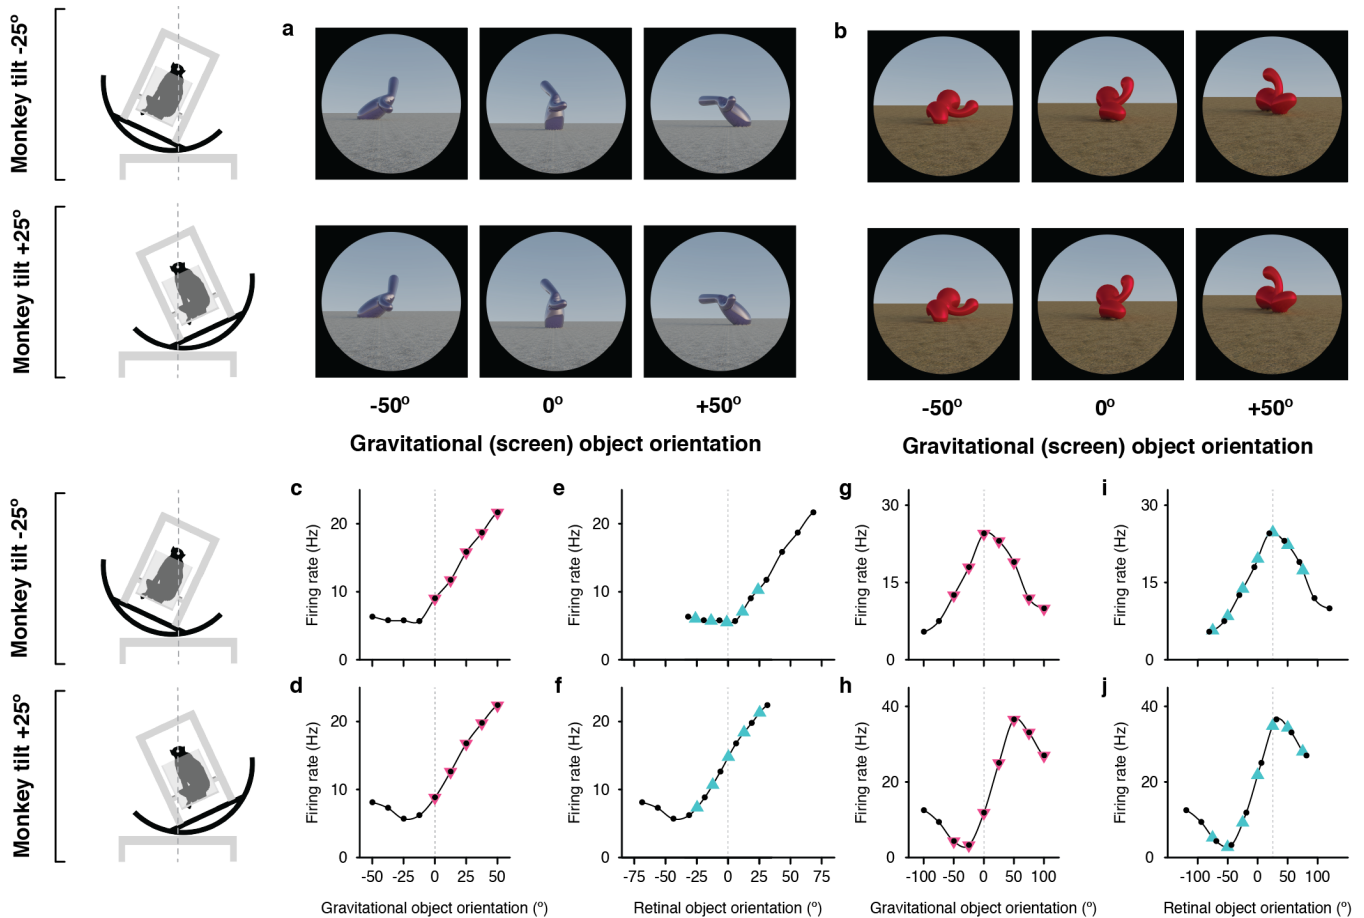

540  
541

**Figure S2. Example neurons tuned in gravitational space and retinal space.** (a,b) Stimuli demonstrating example object orientations used to study the two IT neurons. The orientation discovered in the genetic algorithm experiments is arbitrarily labeled 0°. The two monkey tilt conditions are diagrammed at left. (c,d) Responses of the example IT neuron studied with the stimuli shown in (a), as a function of object orientation on the screen and thus with respect to gravity, across a 100° orientation range, while the monkey was tilted -25° (c) and 25° (d). Response values are averaged across the 750 ms presentation time and across 5 repetitions and smoothed with a boxcar kernel of width 50° (3 orientation values). For this neuron, object orientation tuning remained consistent in screen/gravity space across the two tilt conditions. Other details as in Fig. 1. (e,f) The same data plotted against orientation on the retina, corrected for 6° counter-rolling of the eyes in each tilt condition. Due to the shift produced by ocular counter-rolling, these comparison values were interpolated between tested screen orientations using a Catmull-Rom spline. Since orientation tuning was consistent in gravitational space, the tuning functions are shifted right or left by about 20° each. (g,h) Responses of a different example IT neuron studied with the stimuli shown in (b), as a function of object orientation on the screen and thus with respect to gravity, across a 100° orientation range, while the monkey was tilted -25° (g) and 25° (h). In this case, the tuning peak was shifted about 40°, in the direction expected for orientation tuning in retinal space. (i,j) The same data plotted against orientation on the retina, corrected for 6° counter-rolling of the eyes in each tilt condition. The correspondence between curves in (j) and (k), with peaks at near 0°, is consistent with orientation tuning in retinal space.
